# Supplementary material for: Untranslated Region Sequences and the Efficacy of mRNA Vaccines against Tuberculosis
Source: MDPI journal article supplement (doi:10.3390/ijms25020888), 2024-01-10
Supplement: s1 [file s1]

### 3'UTR THP1 UTR FREE ENERGY

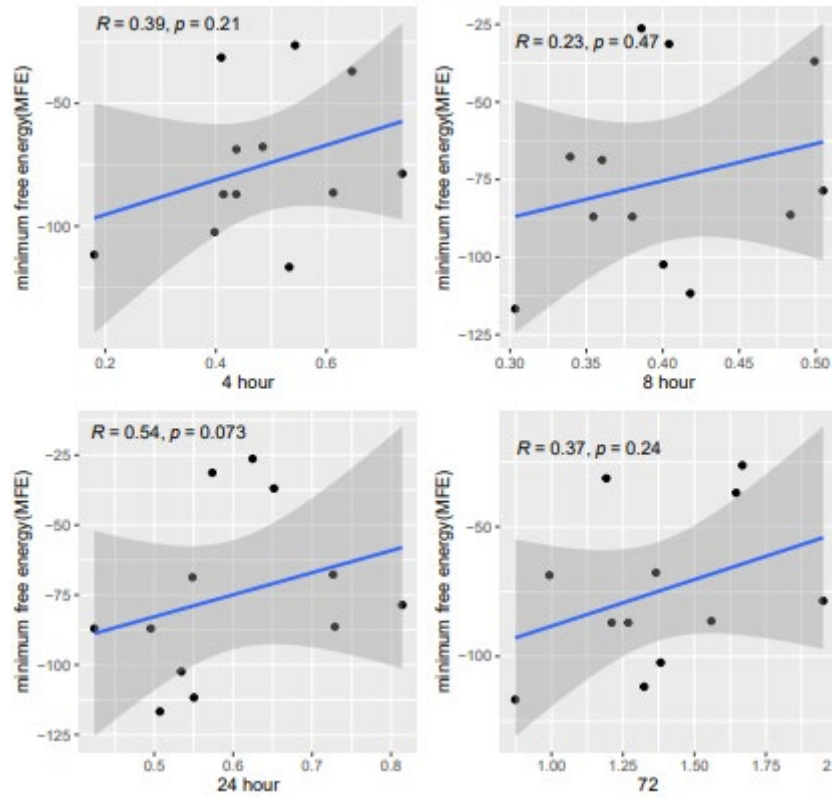

### 3'UTR THP1 WHOLE SEQ FREE ENERGY

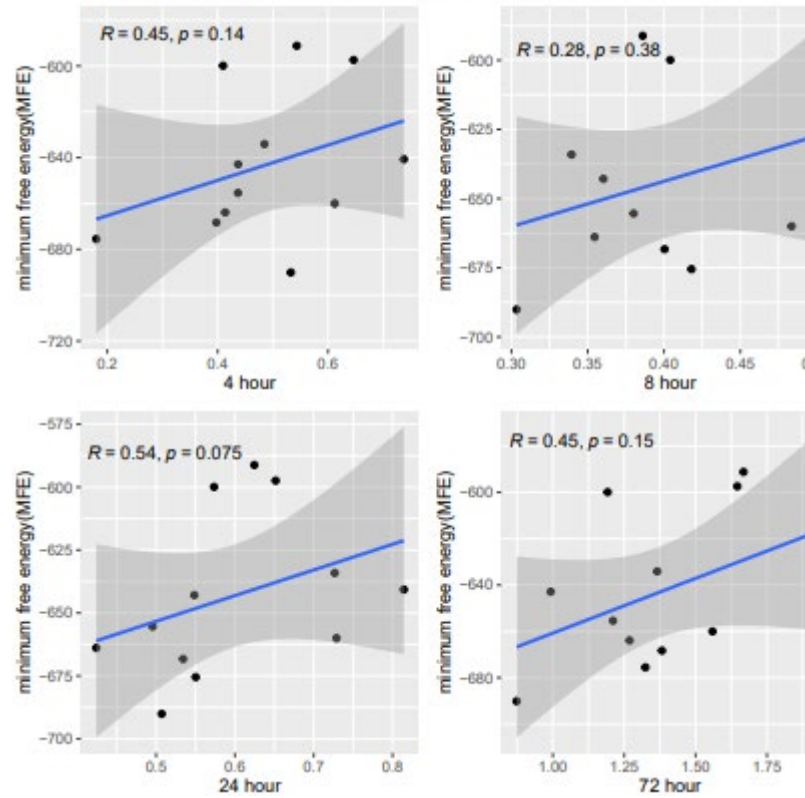

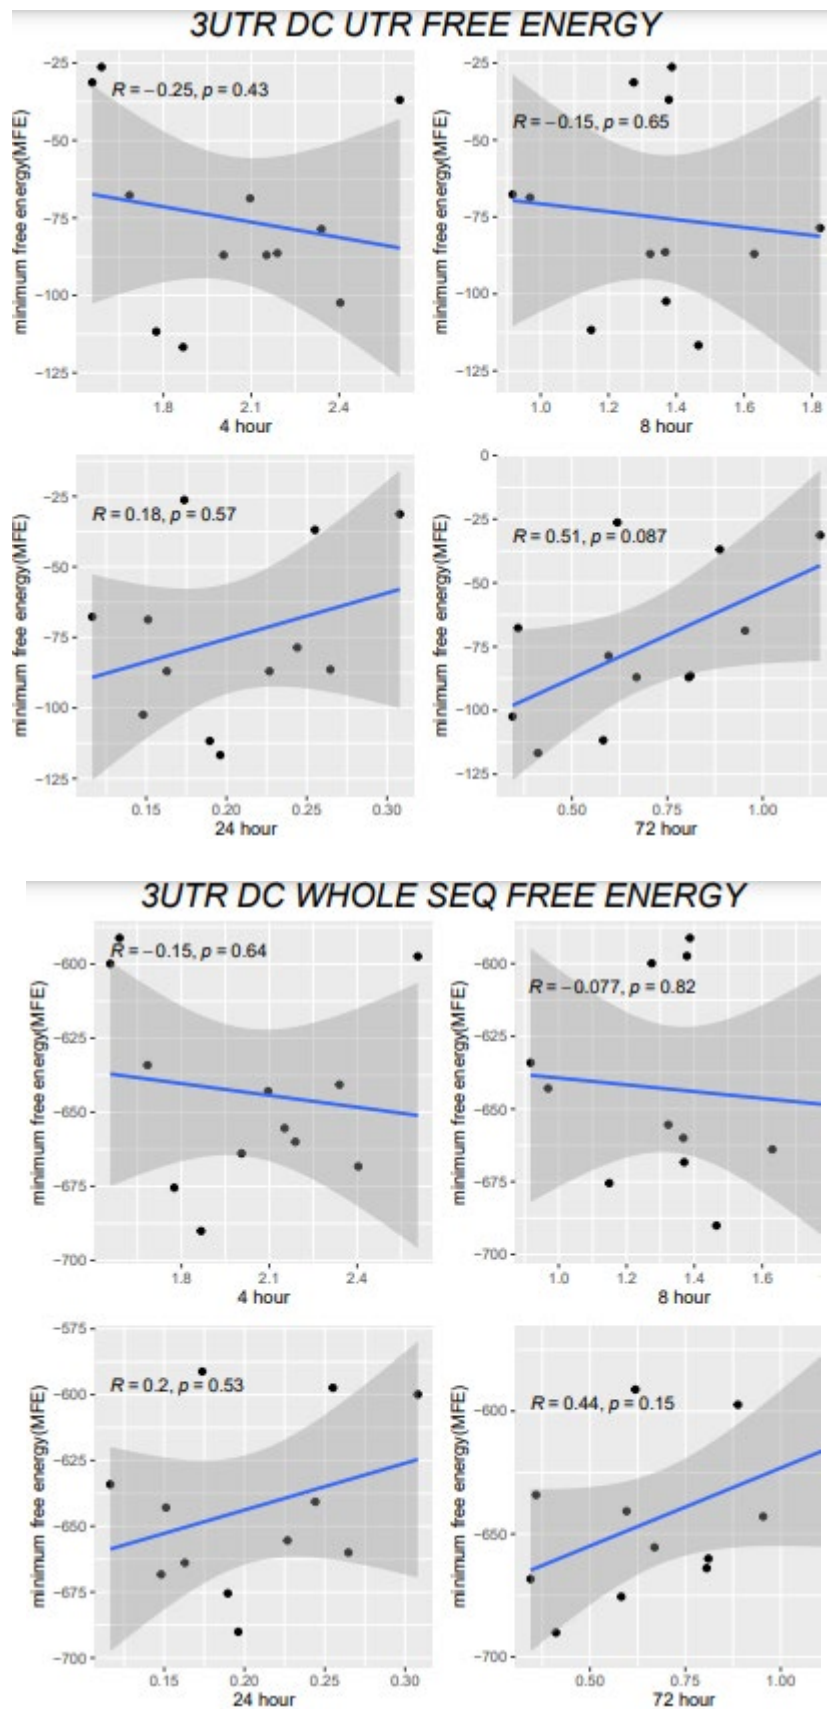

**Supplementary Figure S1.** Correlation between minimum free energy (MFE) RNA sequences and intensity of bioluminescence.
