# Supplementary material for: Untranslated Region Sequences and the Efficacy of mRNA Vaccines against Tuberculosis
Source: MDPI journal article supplement (doi:10.3390/ijms25020888), 2024-01-10
Supplement: s1 [file s1]

**Supplementary Table S2. 5' and 3'UTRs sequences.**

| Name                    | UTR   | Sequence                                                                                                                                                                                                                                                                                                                                                                                    |
|-------------------------|-------|---------------------------------------------------------------------------------------------------------------------------------------------------------------------------------------------------------------------------------------------------------------------------------------------------------------------------------------------------------------------------------------------|
| FH1                     | 5'UTR | GGGAAATAGCCCAGAAATTCTACCCAAGCTCCCTCGCCAC                                                                                                                                                                                                                                                                                                                                                    |
| GAPDH                   | 5'UTR | GGGAAATAGCTCTCTGCTCCTCCTGTTTCGACAGTCAGCCGCATCTTCTT<br>TTGCGTCGCCAGCCGAGCCACATCGCTCAGCCACC                                                                                                                                                                                                                                                                                                   |
| eEF2                    | 5'UTR | GGGAAATACACATCCGCCGTCGTCGCCGCCATCCTCGGCGCGACTCGC<br>TTCTTTCGGTTCTACCTGGGAGAATCCACCGCCATCCGCCACC                                                                                                                                                                                                                                                                                             |
| HSPA1A                  | 5'UTR | GGGAAATAACGGCTAGCCTGAGGAGCTGCTGCGACAGTCCACTACCT<br>TTTTTCGAGAGTGACTCCCGTTGTCCCAAGGCTTCCAGAGCGAACCTG<br>TGCGGCTGCAGGCACCGGCGCGTCGAGTTTCCGGCGTCCGGAAGGAC<br>CGAGCTCTTCTCGCGGATCCAGTGTTCCGTTTCCAGCCCCCAATCTCAG<br>AGCGGAGCCGACAGAGAGCAGGGAACCGGCGCCACC                                                                                                                                         |
| H4C2                    | 5'UTR | GGGAAATAGTACCTGGTTTTTGTGTTGTCTGAGTGGTTAGCCACC                                                                                                                                                                                                                                                                                                                                               |
| HBB                     | 5'UTR | GGGAAATACATTTGCTTCTGACACAACCTGTGTTCACTAGCAACCTCAA<br>ACAGCCACC                                                                                                                                                                                                                                                                                                                              |
| C3                      | 5'UTR | GGGAAATACTCCTCCCCATCCTCTCCCTCTGTCCCTCTGTCCCTCTGAC<br>CCTGCACTGTCCAGCCACC                                                                                                                                                                                                                                                                                                                    |
| CFL1                    | 5'UTR | GGGAAATAGTTCAGTCGGGTCCCGGCAGCGGCTGCAGCGCTCTCGTCT<br>TCTGCGGCTCTCGGTGCCCTCTCCTTTTCGTTTCCGCCACC                                                                                                                                                                                                                                                                                               |
| Rabb                    | 5'UTR | GGGAAATACACTTGCTTTGACACAACCTGTGTTTACTTGCAATCCCCCA<br>AAACAGACAGACGCCACC                                                                                                                                                                                                                                                                                                                     |
| TPL                     | 5'UTR | GGGAAATACTCTCTTCGCATCGCTGTCTGCGAGGGCCAGCTGTTGGGC<br>TCGCGGTTGAGGACAACTCTTCGCGGTCTTTCCAGTACTCTTGGATC<br>GGAAACCCGTCGGCCTCCGAACGGTACTCCGCCACCGAGGGACCTGA<br>GCGAGTCCGCATCGACCGGATCGGAAAACCTCTCGAGAAAGGCGTCT<br>AACCAGTCACAGTCGCAAGAAGCTTAGCATTCCGGTAACTGTTGGTAA<br>AGCCACC                                                                                                                    |
| RNA-1273<br>(Moderna)   | 5'UTR | GGGAAATAAGAGAGAGAAAAGAAGAGTAAGAAGAAATATAAGACCCCG<br>GCGCCGCCACC                                                                                                                                                                                                                                                                                                                             |
| BNT162b2<br>(Bionthech) | 5'UTR | GAGAATAAACTTGTATTCTTCTGGTCCCCACAGACTCAGAGAGAACCC<br>GCCACC                                                                                                                                                                                                                                                                                                                                  |
| HBB                     | 3'UTR | GATCCTGGACTGTTTCCTGATAACCATAAGAAGACCCTATTTCCCTAG<br>ATTCTATTTTCTGAACCTTGGAACACAATGCCTACTTCAAGGGTATGG<br>CTTCTGCCTAATAAAGAATGTTTCAGCTCAA                                                                                                                                                                                                                                                     |
| HBB-<br>EMCV            | 3'UTR | GATCCTGGACTGTTTCCTGATAACCATAAGAAGACCCTATTTCCCTAG<br>ATTCTATTTTCTGAACCTTGGAACACAATGCCTACTTCAAGGGTATGG<br>CTTCTGCCTAATAAAGAATGTTTCAGCTCAAGGGGCTGAAGGATGCCCA<br>GAAGGTACCCCATTTGTATGGGATCTGATCTGGGGCCTCGGTGCACATG<br>CTTTACATGTGTTTAGTCGAGGTTAAAAAGCGTCTAGGCCCCCGAAC<br>CACGGGGACGTGGTTTTCTTTGAAAAACACGATGATAATATGGCCAC<br>AACCGGCTTCTGCCTAATAAAGAATGTTTCAGCTCAA                               |
| mtRNR-<br>EMCV          | 3'UTR | CAAGCACGCAGCAATGCAGCTCAAAAACGCTTAGCCTAGCCACACCCC<br>CACGGGAAACAGCAGTGATTAACCTTTGCAATAAACGAAAGTTTAAC<br>TAAGCTATACTAACCCCAGGGTTGGTCAATTTTCGTGCCAGCCACACCC<br>TGGAGCTAGCGGGGCTGAAGGATGCCCAGAAGGTACCCCATTTGTATG<br>GGATCTGATCTGGGGCCTCGGTGCACATGCTTTACATGTGTTTAGTCG<br>AGGTAAAAAGCGTCTAGGCCCCCGAACACGGGGACGTGGTTTTCC<br>TTTGAAAAACACGATGATAATATGGCCACAACCGGCTTCTGCCTAATA<br>AAGAATGTTTCAGCTCAA |
| mtRNR                   | 3'UTR | CAAGCACGCAGCAATGCAGCTCAAAAACGCTTAGCCTAGCCACACCCC<br>CACGGGAAACAGCAGTGATTAACCTTTGCAATAAACGAAAGTTTAAC                                                                                                                                                                                                                                                                                         |

|                         |       |                                                                                                                                                                                                                                                                                                                                                                                 |
|-------------------------|-------|---------------------------------------------------------------------------------------------------------------------------------------------------------------------------------------------------------------------------------------------------------------------------------------------------------------------------------------------------------------------------------|
|                         |       | TAAGCTATACTAACCCCAGGGTTGGTCAATTTTCGTGCCAGCCACACCC<br>TGGAGCTAGC                                                                                                                                                                                                                                                                                                                 |
| mtRNR-<br>mtRNR         | 3'UTR | CAAGCACGCAGCAATGCAGCTCAAAACGCTTAGCCTAGCCACACCCC<br>CACGGGAAACAGCAGTGATTAACCTTTGCAATAAACGAAAGTTTAAC<br>TAAGCTATACTAACCCCAGGGTTGGTCAATTTTCGTGCCAGCCACACCC<br>TGGAGCTAGCCAAGCACGCAGCAATGCAGCTCAAAACGCTTAGCCTA<br>GCCACACCCCCACGGGAAACAGCAGTGATTAACCTTTGCAATAAACG<br>AAAGTTTAACTAAGCTATACTAACCCCAGGGTTGGTCAATTTTCGTGCC<br>AGCCACACCCTGGAGCTAGC                                      |
| mtRNR-<br>AES           | 3'UTR | CAAGCACGCAGCAATGCAGCTCAAAACGCTTAGCCTAGCCACACCCC<br>CACGGGAAACAGCAGTGATTAACCTTTGCAATAAACGAAAGTTTAAC<br>TAAGCTATACTAACCCCAGGGTTGGTCAATTTTCGTGCCAGCCACACCC<br>TGGAGCTAGCCTCGAGCTGGTACTGCATGCACGCAATGCTAGCTGCC<br>CTTTCCCGTCCTGGGTACCCCGAGTCTCCCCGACCTCGGGTCCCAGG<br>TATGCTCCACCTCCACCTGCCCCACTCACCACTCTGCTAGTTCCAGA<br>CACCTCC                                                     |
| mtRNR-<br>HBB           | 3'UTR | CAAGCACGCAGCAATGCAGCTCAAAACGCTTAGCCTAGCCACACCCC<br>CACGGGAAACAGCAGTGATTAACCTTTGCAATAAACGAAAGTTTAAC<br>TAAGCTATACTAACCCCAGGGTTGGTCAATTTTCGTGCCAGCCACACCC<br>TGGAGCTAGCGATCCTGGACTGTTTCCTGATAACCATAAGAAGACCC<br>ATTTCCCTAGATTCTATTTTCTGAACTGGGAACACAATGCCTACTTCA<br>AGGGTATGGCTTCTGCCTAATAAAGAATGTTTCAGCTCAA                                                                      |
| AES-HBB                 | 3'UTR | CTCGAGCTGGTACTGCATGCACGCAATGCTAGCTGCCCCCTTTCCCGTC<br>CTGGGTACCCCGAGTCTCCCCGACCTCGGGTCCCAGGTATGCTCCCA<br>CCTCCACCTGCCCCACTCACCACTCTGCTAGTTCCAGACACCTCCGAT<br>CCTGGACTGTTTCCTGATAACCATAAGAAGACCCATTTCCCTAGATT<br>CTATTTTCTGAACTTGGGAACACAATGCCTACTTCAAGGGTATGGCTT<br>CTGCCTAATAAAGAATGTTTCAGCTCAA                                                                                 |
| AES-EMCV                | 3'UTR | CTCGAGCTGGTACTGCATGCACGCAATGCTAGCTGCCCCCTTTCCCGTC<br>CTGGGTACCCCGAGTCTCCCCGACCTCGGGTCCCAGGTATGCTCCCA<br>CCTCCACCTGCCCCACTCACCACTCTGCTAGTTCCAGACACCTCCGG<br>GGCTGAAGGATGCCCAGAAGGTACCCCATTTGTATGGGATCTGATCTGG<br>GGCCTCGGTGCACATGCTTTACATGTGTTTAGTCGAGGTTAAAAAGCG<br>TCTAGGCCCCCGAACCACGGGGACGTGGTTTTCTTTGAAAAACACG<br>ATGATAATATGGCCACAACCGGCTTCTGCCTAATAAAGAATGTTTCAGC<br>TCAA |
| AES-AES                 | 3'UTR | CTCGAGCTGGTACTGCATGCACGCAATGCTAGCTGCCCCCTTTCCCGTC<br>CTGGGTACCCCGAGTCTCCCCGACCTCGGGTCCCAGGTATGCTCCCA<br>CCTCCACCTGCCCCACTCACCACTCTGCTAGTTCCAGACACCTCCCTC<br>GAGCTGGTACTGCATGCACGCAATGCTAGCTGCCCCCTTTCCCGTCCTG<br>GGTACCCCGAGTCTCCCCGACCTCGGGTCCCAGGTATGCTCCACCT<br>CCACCTGCCCCACTCACCACTCTGCTAGTTCCAGACACCTCC                                                                   |
| RNA-1273<br>(Moderna)   | 3'UTR | GCTGGAGCCTCGGTGGCCTAGCTTCTTGCCCCTTGGGCCTCCCCCAG<br>CCCCTCCTCCCCTTCTGACCGTACCCCGTGTCTTTGAATAAAGTCT<br>GAGTGGGCGGCA                                                                                                                                                                                                                                                               |
| BNT162b2<br>(Bionthech) | 3'UTR | CTCGAGCTGGTACTGCATGCACGCAATGCTAGCTGCCCCCTTTCCCGTC<br>CTGGGTACCCCGAGTCTCCCCGACCTCGGGTCCCAGGTATGCTCCCA<br>CCTCCACCTGCCCCACTCACCACTCTGCTAGTTCCAGACACCTCCCA<br>AGCACGCAGCAATGCAGCTCAAAACGCTTAGCCTAGCCACACCCCCA<br>CGGGAAACAGCAGTGATTAACCTTTGCAATAAACGAAAGTTTAAC<br>AGCTATACTAACCCCAGGGTTGGTCAATTTTCGTGCCAGCCACACCCTG<br>GAGCTAGC                                                    |
