# Supplementary material for: Untranslated Region Sequences and the Efficacy of mRNA Vaccines against Tuberculosis
Source: Int J Mol Sci. 2024 Jan 10;25(2):888. doi: 10.3390/ijms25020888 (PMC10815675; doi:10.3390/ijms25020888)
Supplement: Supplementary file 1 [file ijms-25-00888-s001.zip › Supplement Table S1 R1.xlsx]

## Sheet: THP1-DC2.4
Supplementary Table S1: The list of differentially expressed genes between THP1 and DC2.4 cell lines
Gene name	DC2.4(SRR10967879)	DC2..4(SRR10967880)	DC2.4(SRR10967882)	THP1(SRR24910839)	THP1(SRR24910838)	THP1(SRR24910837)	THP1(SRR24910836)	baseMean	log2FoldChange	lfcSE	stat	pvalue	padj	DC24_mean	THP1_mean
ANKHD1	60.2504	57.6368	58.5532	1.2491	1.49195	1.99942	1.27913	2370.22	-4.87746	0.108684	-44.8775	0	0	58.8134	1.5049
IGF2BP2	3.39987	3.16315	3.2715	55.0315	53.9519	54.2799	50.6823	3647.39	4.71631	0.0707259	66.6844	0	0	3.27817	53.4864
PPRC1	162.548	149.928	151.59	25.1763	24.6914	24.4248	23.6048	5423.22	-1.98683	0.0506057	-39.2611	0	0	154.689	24.4743
YBX1	1862.41	1810.35	1679.18	4470.71	4320.88	4226.53	4176.16	130561	2.15184	0.0464659	46.3102	0	0	1783.98	4298.57
MATR3	44.9794	51.3284	50.4968	158.589	167.354	165.115	168.656	13539.9	2.04989	0.0580171	35.3325	1.86e-273	4.48e-272	48.9349	164.929
SRSF4	23.6093	22.3335	20.1021	23.3399	22.6165	23.9767	21.2317	2521.14	2.33054	0.0719814	32.3769	5.8e-230	1.07e-228	22.0149	22.7912
RBM28	96.762	95.5406	102.742	6.01893	6.53511	6.77521	6.19753	3126.9	-1.95088	0.0618885	-31.5226	4.26e-218	7.34e-217	98.3483	6.38169
RBM45	147.913	139.699	162.757	5.53697	4.93395	5.37314	4.81768	1500.21	-2.35419	0.0850443	-27.6819	1.15e-168	1.44e-167	150.123	5.16544
HNRNPL	287.982	283.71	271.65	220.075	214.743	216.985	204.143	11102.7	-1.17872	0.0428001	-27.5402	5.81e-167	7.13e-166	281.114	213.987
FMR1	74.973	77.4252	67.1649	27.5299	28.2786	31.3313	29.8593	3792.1	-1.79657	0.0706633	-25.4243	1.36e-142	1.38e-141	73.1877	29.2498
PABPC4	333.758	308.474	391.394	980.32	997.899	939.194	1018.99	30842.2	1.69741	0.0734969	23.095	5.2e-118	4.36e-117	344.542	984.102
RBM42	0.0851983	0.175425	0.149561	121.904	119.17	117.3	110.252	1606.34	9.88141	0.440472	22.4337	1.85e-111	1.47e-110	0.136728	117.157
RBM4	2.18866	3.20117	2.73251	18.3392	15.6869	16.8799	18.0587	632.836	2.94589	0.135815	21.6904	2.53e-104	1.88e-103	2.70745	17.2412
IGF2BP3	17.387	16.3712	16.2035	0.0567057	0.0753294	0.0361171	0.0735544	569.725	-8.26988	0.386976	-21.3705	2.51e-101	1.83e-100	16.6539	0.0604267
ZC3H14	74.5443	74.3728	72.8521	8.71924	8.68874	8.05574	9.13925	3788.41	-1.26352	0.059715	-21.1593	2.27e-99	1.62e-98	73.9231	8.65074
TRA2A	80.9135	84.448	75.4604	51.9859	57.4232	60.0974	57.0651	3516.21	-1.38493	0.0679302	-20.3875	2.16e-92	1.44e-91	80.274	56.6429
FUBP1	114.711	117.318	90.8931	51.8455	54.2546	54.8178	48.9091	9889.94	-1.66785	0.0829531	-20.106	6.54e-90	4.27e-89	107.641	52.4568
FXR2	92.9842	87.1617	99.2534	23.2904	27.5905	24.6599	26.2494	2099.28	-1.61871	0.0814535	-19.8728	6.99e-88	4.47e-87	93.1331	25.4476
PUM2	200.793	207.088	216.57	37.455	37.0055	40.1224	37.5088	10858.9	-0.887505	0.047112	-18.8382	3.67e-79	2.14e-78	208.15	38.0229
TARDBP	216.542	230.839	185.824	85.3485	89.3497	92.2889	91.0383	10599.2	-1.29736	0.0719164	-18.0398	9.49e-73	5.18e-72	211.069	89.5064
RBM25	66.1396	67.5369	57.44	46.2832	48.6569	50.9071	48.168	7432.4	-1.13287	0.065447	-17.3098	3.97e-67	2.04e-66	50.7934	48.5038
TUT1	60.0885	61.9787	63.8741	23.6751	24.802	24.5771	21.5366	1451.7	-1.26367	0.074072	-17.06	2.95e-65	1.49e-64	61.9804	23.6477
SRSF1	368.045	384.045	347.354	48.8705	48.8815	50.8856	48.3872	15537.1	-0.777152	0.0466005	-16.6769	1.93e-62	9.45e-62	366.481	49.2562
HNRNPA0	217.982	219.778	226.397	81.975	76.0833	77.9527	75.2914	7966.23	0.733894	0.044765	16.3944	2.1e-60	1.01e-59	221.385	77.8256
HNRNPF	514.122	512.319	552.853	225.561	210.264	219.515	205.553	12057.8	-0.736612	0.0481127	-15.3101	6.54e-53	2.87e-52	526.431	215.223
HuR	28.6196	30.5345	29.0356	57.3794	56.031	56.1705	59.1669	4147.33	0.760776	0.0533948	14.2481	4.61e-46	1.83e-45	29.3965	57.187
HNRNPH2	123.394	124.821	168.581	0	0	0	0	2534.53	-14.7573	1.03945	-14.1972	9.53e-46	3.77e-45	138.932	0
PRR3	26.2645	26.2177	30.1677	9.11553	9.30662	9.01655	8.14726	641.841	-1.48741	0.105607	-14.0844	4.74e-45	1.86e-44	27.55	8.89649
SRSF5	294.929	294.571	237.88	122.515	144.985	152.758	130.902	7144.28	-1.26249	0.0907056	-13.9186	4.89e-44	1.89e-43	275.793	137.79
PABPN1	34.181	38.3703	25.7963	5.90328	5.33929	5.3399	4.33777	540.085	-2.15241	0.158894	-13.5462	8.35e-42	3.11e-41	32.7825	5.23006
RBM5	29.5612	30.5144	29.7788	59.746	56.1258	60.4151	52.0112	3398.07	-0.810479	0.0599627	-13.5164	1.25e-41	4.66e-41	29.9515	57.0745
EIF4G2	848.443	883.744	812.994	897.326	903.152	870.731	928.464	66997.6	-0.632202	0.0470313	-13.4422	3.42e-41	1.26e-40	848.394	899.918
SRSF11	117.552	121.938	103.729	30.422	31.7137	33.1628	30.1031	7004.53	-0.857157	0.0648581	-13.2159	7.11e-40	2.56e-39	114.406	31.3504
EWSR1	228.102	229.414	226.967	237.345	236.236	248.375	227.942	10888.4	-0.512243	0.039616	-12.9302	3.04e-38	1.07e-37	228.161	237.475
CPEB4	73.4065	75.2352	67.1407	18.3352	19.8391	19.329	18.5527	3383.73	-0.793326	0.0626519	-12.6624	9.55e-37	3.28e-36	71.9274	19.014
CPEB2	50.503	56.4842	50.0425	56.4	57.6988	58.3006	53.1844	5560.32	0.757646	0.0603122	12.5621	3.41e-36	1.16e-35	52.3432	56.396
PCBP1	678.628	654.985	706.156	717.139	695.378	698.485	706.409	15046.9	0.508109	0.0413429	12.2901	1.02e-34	3.39e-34	679.923	704.353
RBMS1	155.385	157.066	138.552	76.6122	76.961	75.1821	77.5782	6272.95	-0.690985	0.0575538	-12.0059	3.31e-33	1.07e-32	150.334	76.5834
ZFP36	36.3158	30.2639	31.2621	0	0	0	0	472.436	-12.3333	1.02797	-11.9977	3.65e-33	1.18e-32	32.6139	0
SRSF7	189.985	194.056	165.002	89.2663	87.1662	87.0805	83.8424	4820.44	-0.779268	0.0651179	-11.967	5.29e-33	1.7e-32	183.014	86.8389
FXR1	32.828	32.7892	33.8949	29.0734	27.2459	26.5668	29.267	2880.66	0.704671	0.0612937	11.4966	1.37e-30	4.21e-30	33.1707	28.0383
HNRPLL	40.0382	41.693	42.2745	43.5843	43.9036	47.2156	47.3472	3737.37	-0.642866	0.0571024	-11.2581	2.11e-29	6.34e-29	41.3352	45.5127
RBM22	55.526	53.2529	56.3686	135.301	130.264	141.284	146.252	3801.76	0.653905	0.0592312	11.0399	2.45e-28	7.21e-28	55.0492	138.275
SART3	67.9651	69.7366	68.2301	42.268	42.4636	43.0001	43.3242	3104.96	-0.543602	0.0497029	-10.937	7.67e-28	2.23e-27	68.6439	42.764
RBM41	10.8961	11.2639	12.0163	10.5654	10.1777	10.4876	9.97796	1064.38	0.829529	0.0760858	10.9025	1.12e-27	3.25e-27	11.3921	10.3022
HNRNPM	222.052	219.732	202.2	310.875	304.347	303.039	307	13918.8	-0.486246	0.0464764	-10.4622	1.29e-25	3.55e-25	214.661	306.316
QKI	76.0799	80.9217	80.1553	63.8104	71.0688	66.6952	67.3816	13712.1	0.523631	0.0529587	9.88753	4.72e-23	1.23e-22	79.0523	67.239
RBM6	25.7549	27.3063	24.8585	13.8249	13.07	13.7242	11.0685	2693.07	-0.772031	0.079563	-9.70339	2.92e-22	7.42e-22	25.9732	12.9219
MSI1	3.74435	3.52064	3.0467	0	0	0	0	83.2372	-9.8286	1.0526	-9.33741	9.87e-21	2.41e-20	3.43723	0
SRSF10	172.159	180.388	126.342	45.1159	49.7479	51.0036	47.162	7965.44	-0.916489	0.101612	-9.01952	1.89e-19	4.45e-19	159.63	48.2573
U2AF2	271.304	275.278	237.592	215.693	217.868	220.417	195.303	8487.63	-0.581874	0.0645274	-9.01747	1.92e-19	4.54e-19	261.391	212.32
RBM8A	148.58	153.675	157.741	51.8626	49.2023	47.0487	48.8426	4016.15	-0.487692	0.0548027	-8.89905	5.63e-19	1.31e-18	153.332	49.2391
RALY	169.737	162.486	153.53	80.2789	76.9245	75.9271	77.6928	6266.57	0.445582	0.0510067	8.73575	2.42e-18	5.52e-18	161.918	77.7058
TRNAU1AP	31.9517	31.6412	36.5275	18.2735	14.8487	14.1479	15.7455	626.041	-1.02147	0.117961	-8.65942	4.74e-18	1.07e-17	33.3735	15.7539
ILF2	90.3281	91.9133	88.2457	219.693	218.13	220.933	224.25	6575.51	-0.36475	0.0427664	-8.52889	1.48e-17	3.3e-17	90.1624	220.752
SNRPA	105.219	97.9775	103.007	119.766	112.668	122.166	113.697	2473.57	-0.476891	0.0574376	-8.30276	1.02e-16	2.22e-16	102.068	117.074
RBMS2	21.9298	20.3043	22.4228	3.60691	3.50276	3.60441	2.98463	712.421	-0.79891	0.0992567	-8.04892	8.35e-16	1.79e-15	21.5523	3.42468
HNRNPA2B1	805.453	839.12	663.908	675.027	647.029	670.186	618.591	40519.2	-0.542817	0.0722557	-7.51245	5.8e-14	1.18e-13	769.494	652.708
BRUNOL6	0.0514813	0.127201	0	0.955892	1.76747	1.28348	1.15613	38.3205	4.93459	0.661758	7.45679	8.87e-14	1.79e-13	0.0595608	1.29074
SF1	234.901	217.666	226.001	202.015	202.554	194.599	198.591	12204.2	-0.302842	0.0436274	-6.94156	3.88e-12	7.42e-12	226.189	199.439
MBNL1	78.8302	83.5783	64.9687	163.008	184.645	179.529	180.483	17495.4	0.550945	0.0810729	6.79567	1.08e-11	2.04e-11	75.7924	176.916
FUBP3	72.6081	69.4839	75.8475	55.7133	54.231	52.6938	49.9571	3644.82	-0.369356	0.0575875	-6.41382	1.42e-10	2.59e-10	72.6465	53.1488
HNRNPU	416.044	419.211	392.572	410.543	399.678	399.798	387.388	42029.6	-0.251127	0.0397348	-6.32006	2.61e-10	4.73e-10	409.276	399.352
CNOT4	17.9856	19.4603	18.271	16.6002	14.799	17.8359	15.638	1473.9	-0.501108	0.079934	-6.26902	3.63e-10	6.54e-10	18.5723	16.2182
RBFOX2	21.3208	21.7283	22.6333	11.2336	9.73672	10.336	10.8044	1484.8	-0.423997	0.0741731	-5.71632	1.09e-08	1.87e-08	21.8942	10.5277
TIA1	15.2327	16.8788	12.7623	23.3298	25.5398	25.415	21.7119	2882.62	0.533838	0.0957255	5.57676	2.45e-08	4.16e-08	14.9579	23.9991
RBM4B	8.49034	8.64665	6.15683	5.8783	6.12288	6.87416	6.99979	577.266	-0.766404	0.142714	-5.37019	7.87e-08	1.31e-07	7.76461	6.46878
PTBP3	196.395	205.893	198.159	122.791	129.568	132.334	129.454	16071.9	0.236497	0.044668	5.29459	1.19e-07	1.97e-07	200.149	128.537
KHSRP	250.962	255.217	230.825	206.218	199.086	205.256	200.03	11447.6	0.248264	0.0473731	5.24061	1.6e-07	2.64e-07	245.668	202.647
HNRNPA1	860.501	916.102	880.835	593.048	603.973	602.29	571.251	29631.3	0.208469	0.0406599	5.12713	2.94e-07	4.79e-07	885.813	592.64
RBM3	245.278	251.997	247.867	151.453	161.336	158.582	163.07	10394.8	-0.234341	0.0465682	-5.03221	4.85e-07	7.83e-07	248.381	158.61
PCBP2	295.564	282.631	329	279.245	281.47	269.682	287.539	13748.5	-0.286931	0.0592947	-4.83906	1.3e-06	2.07e-06	302.398	279.484
SRSF9	139.106	127.432	125.709	154.901	149.776	161.862	165.444	2376.52	0.292862	0.0663344	4.41492	1.01e-05	1.55e-05	130.749	157.996
HNRNPH1	395.802	396.076	273.45	232.615	242.573	261.997	216.23	15967.5	-0.66093	0.151849	-4.35254	1.35e-05	2.05e-05	355.11	238.354
TAF15	157.995	161.343	197.728	129.385	124.409	130.881	109.695	4263.6	-0.373024	0.0872006	-4.27777	1.89e-05	2.86e-05	172.355	123.592
SNRNP70	74.5362	77.9449	77.4496	177.811	171.91	181.444	155.02	5183.44	-0.243817	0.058456	-4.17094	3.03e-05	4.56e-05	76.6436	171.547
PUM1	79.7875	76.6381	86.9976	78.2537	70.8873	75.7296	70.8363	5258.47	0.247725	0.0600612	4.12455	3.71e-05	5.56e-05	81.1411	73.9267
PCBP4	18.4317	17.8785	17.8455	15.031	14.6411	16.4663	14.4186	861.205	0.330658	0.0832059	3.97397	7.07e-05	0.000104432	18.0519	15.1393
PUF60	101.707	100.565	108.896	110.535	103.384	100.888	102.301	5234.07	0.212748	0.0542849	3.9191	8.89e-05	0.000130716	103.723	104.277
FUS	126.457	133.722	122.333	184.245	177.776	173.903	164.718	13487.2	-0.193489	0.0516937	-3.74299	0.000181842	0.0002635	127.504	175.16
CELF1	140.671	139.898	126.56	43.5319	41.5976	44.3206	39.8176	10356.9	-0.195972	0.0545074	-3.59533	0.000323976	0.000463975	135.71	42.3169
DAZAP1	174.13	166.83	173.012	80.6853	81.1492	85.0239	78.192	5237.97	0.157886	0.0457461	3.45135	0.000557798	0.000788426	171.324	81.2626
HNRNPC	395.558	398.607	463.506	171.163	164.971	169.324	170.736	19198.8	0.205584	0.0597188	3.44254	0.000576279	0.000813862	419.224	169.049
RBM47	47.9372	46.3189	46.5069	31.1775	31.0445	28.726	32.2552	3501.7	0.165559	0.0600091	2.7589	0.00579961	0.00773623	46.921	30.8008
CPEB1	3.04612	2.87506	4.2349	2.34359	2.9229	2.54507	1.96829	167.745	0.461494	0.218671	2.11045	0.0348198	0.0439247	3.38536	2.44496
